# Supplementary material
Source: PubMed Central journal article supplement (PMC3838162)
Supplement: JVI.00826-13_zjv999098181so1.pdf [file JVI.00826-13_zjv999098181so1.pdf]

**Supplementary Table 2.** Nucleotide changes in several sites in the core region and disease progression

|             | CH (N=25) | LC (N=29) | HCC (N=25) | P value |
|-------------|-----------|-----------|------------|---------|
| A36G/C (%)  | 2.76      | 6.20      | 13.55      | 0.575   |
| G209A (%)   | 29.65     | 56.78     | 71.8       | 0.018   |
| A271U/C (%) | 58.25     | 66.54     | 71.19      | 0.290   |
| U309A/C (%) | 38.55     | 60.77     | 44.66      | 0.116   |
| G435A/C (%) | 22.83     | 40.98     | 16.71      | 0.129   |
| G481A (%)   | 2.52      | 4.60      | 0.04       | 0.648   |
